# Supplementary material for: Structural and Mechanistic Insights into a Cu-Adenine MOF for Selective Fluorescence Sensing of Antibiotics: Experimental and TDDFT Approaches
Source: Research Square preprint supplement (doi:10.21203/rs.3.rs-6562459/v1), 2025-05-08
Supplement: Supplementary file 1 [file 4de1089d56ab296281f10216.docx]

**Supporting Information**

**Structural and Mechanistic Insights into a Cu-Adenine MOF for Selective Fluorescence Sensing of Antibiotics: Experimental and TDDFT Approaches**

Tanin Nanok1, Tontrakarn Pongpai1, Kittinan Ketsrisung1, Jiraporn Singhophon1, Kittipong Chainok2, and Tanwawan Duangthongyou1,3*

*1Faculty of Science, Kasetsart University, Bangkok 10900, Thailand.*

*2Thammasat University Research Unit in Multifunctional Crystalline Materials and Applications (TU-MCMA), Faculty of Science and Technology, Thammasat University, Pathum Thani 12120, Thailand.*

*3The Center of Excellence for Innovation in Chemistry (PERCH-CIC), Department of Chemistry, Faculty of Science, Kasetsart University, Bangkok 10900*

**Correspondence should be addressed to Tanwawan Duangthongyou: fscitwd@ku.ac.th*

**Table S1** Selected bond lengths (Å) of [Cu(adenine)(succinate)]ₙ.

| Atom-Atom | Length (Å) | Atom-Atom | Length (Å) |
| --- | --- | --- | --- |
| Cu1-O1  Cu1-N1  Cu1-O2  Cu1-N2  Cu1-N5  O1-C1  O2-C1  C1-C2 | 2.002(2)  1.970(1)  2.011(3)  2.160(1)  2.030(1)  1.247(4)  1.247(4)  1.492(5) | N4-C5  N4-H4A  N4-H4B  C2-H2A  C2-H2B  C3-H3  C6-H6 | 1.340(2)  0.860  0.860  0.969  0.970  0.930  0.930 |

**Table S2** Selected bond angles (º) of[Cu(adenine)(succinate)]ₙ.

| Atom-Atom-Atom | Angle (º) | Atom-Atom-Atom | Angle (º) |
| --- | --- | --- | --- |
| O1-Cu1-N1  O1-Cu1-O2  O1-Cu1-N2  O1-Cu1-N5  N1-Cu1-O2  N1-Cu1-N2  N1-Cu1-N5  O2-Cu1-N2 | 87.1(5)  160.6(1)  105.2(3)  93.9(4)  91.9(5)  100.8(6)  165.9(6)  94.0(3) | O2-Cu1-N5  N2-Cu1-N5  Cu1-O1-C1  C1-O2-Cu1  Cu1-N1-C7  C1-C2-C2  C7-N5-Cu1 | 82.5(4)  92.6(5)  125.3(2)  127.3(2)  127(1)  110.9(3)  119.1(9) |
