# Supplementary material for: Structural and Mechanistic Insights into a Cu-Adenine MOF for Selective Fluorescence Sensing of Antibiotics: Experimental and TDDFT Approaches
Source: Research Square preprint supplement (doi:10.21203/rs.3.rs-6562459/v1), 2025-05-08
Supplement: Supplementary file 2 [file 972e5a4d80eea7d1e85e0fe3.docx]

**Table 2.** Comparison of Stern–Volmer quenching constants (Ksv) for NFZ and NFT detection by different MOF-based fluorescent sensors.

| **Sensor** | KSV (M-1) for NFZ | KSV (M-1) for NFT | Reference |
| --- | --- | --- | --- |
| {[Zn2(bcob)(OH)(H2O)]•DMA}n | 2.50 × 104 | 2.26 × 104 | [45] |
| [Zn(DCPP)(H2O)]•(DMF) | 4.73 × 104 | 6.42 × 104 | [46] |
| Cu0.1/{[Zn(L)]•CH3CN}n | 4.85 × 104 | 5.27 × 104 | [47] |
| [Zn(TTDPa)(bodca)]·H2O | 6.76 × 104 | 5.94 × 104 | [48] |
| [Zn4(ad)3(BPTC)(H2O)4]•0.75ad •0.25NO3•2.5DMF•2.5H2O Film | 4.35 × 104 | 3.14 × 104 | [49] |
| CuAS MOF | 5.98 × 104 | 5.88 × 104 | This work |
