# Supplementary material for: Structural and Mechanistic Insights into a Cu-Adenine MOF for Selective Fluorescence Sensing of Antibiotics: Experimental and TDDFT Approaches
Source: Research Square preprint supplement (doi:10.21203/rs.3.rs-6562459/v1), 2025-05-08
Supplement: Supplementary file 3 [file f35958eab4ccd0923a8eef98.docx]

**Table 1** Crystallographic data for [Cu(Ade)(succinate)]ₙ

| Formula  Empirical formula  Formula weight  Temperature (K)  Crystal system  Space group  a (Å)  b (Å)  c (Å)  α (º)  β (º)  γ (º)  Volume (Å3)  Z  Dc (g cm-3)  F(000)  Crystal size (mm3)  Radiation source  Wavelength  2ϴ range for data collection (o)  Index ranges  No. of reflections collected  Δρmax, Δρmin (e Å3)  R1a/wR2b [I > 2σ(I)]  R1a/wR2b (all)  Goodness-of-fit on F2 | [Cu(Ade)(succinate)]n  C7H6CuN5O2  255.71  283-303  I 41/a (88)  tetragonal  15.7506(4)  15.7506(4)  22.4819(10)  90  90  90  5577.34  16  1.218  2048  0.22 x0.20 x 018  Mo Kα  0.71073  5.17 to 54.25  -19 ≤ h ≤ 20, -20 ≤ k ≤ 20, -28 ≤ l ≤ 28  57263  0.536, -0.38  0.0404/0.1080  0.0508/0.1139  1.053 |
| --- | --- |
|  |  |
